# Supplementary material
Source: Royal Society of Chemistry journal article supplement (https://www.rsc.org/suppdata/p2/1998/1471/g708606a.doc)
Supplement: Supplementary file 1 [file g708606a.doc]

Figure 10 Supplementary material

Potential energy surface of calix[4]arene 4. Calculated PM3 heats of formation as a function of the distance *d* from the *para* C-atoms of two proximal anisole rings and the dihedral angle ** between two neighbouring anisole units.
